# Supplementary material for: Ionising Radiation Induces Promoter DNA Hypomethylation and Perturbs Transcriptional Activity of Genes Involved in Morphogenesis during Gastrulation in Zebrafish
Source: MDPI journal article supplement (doi:10.3390/ijms21114014), 2020-06-04
Supplement: s1 [file s1]

**a**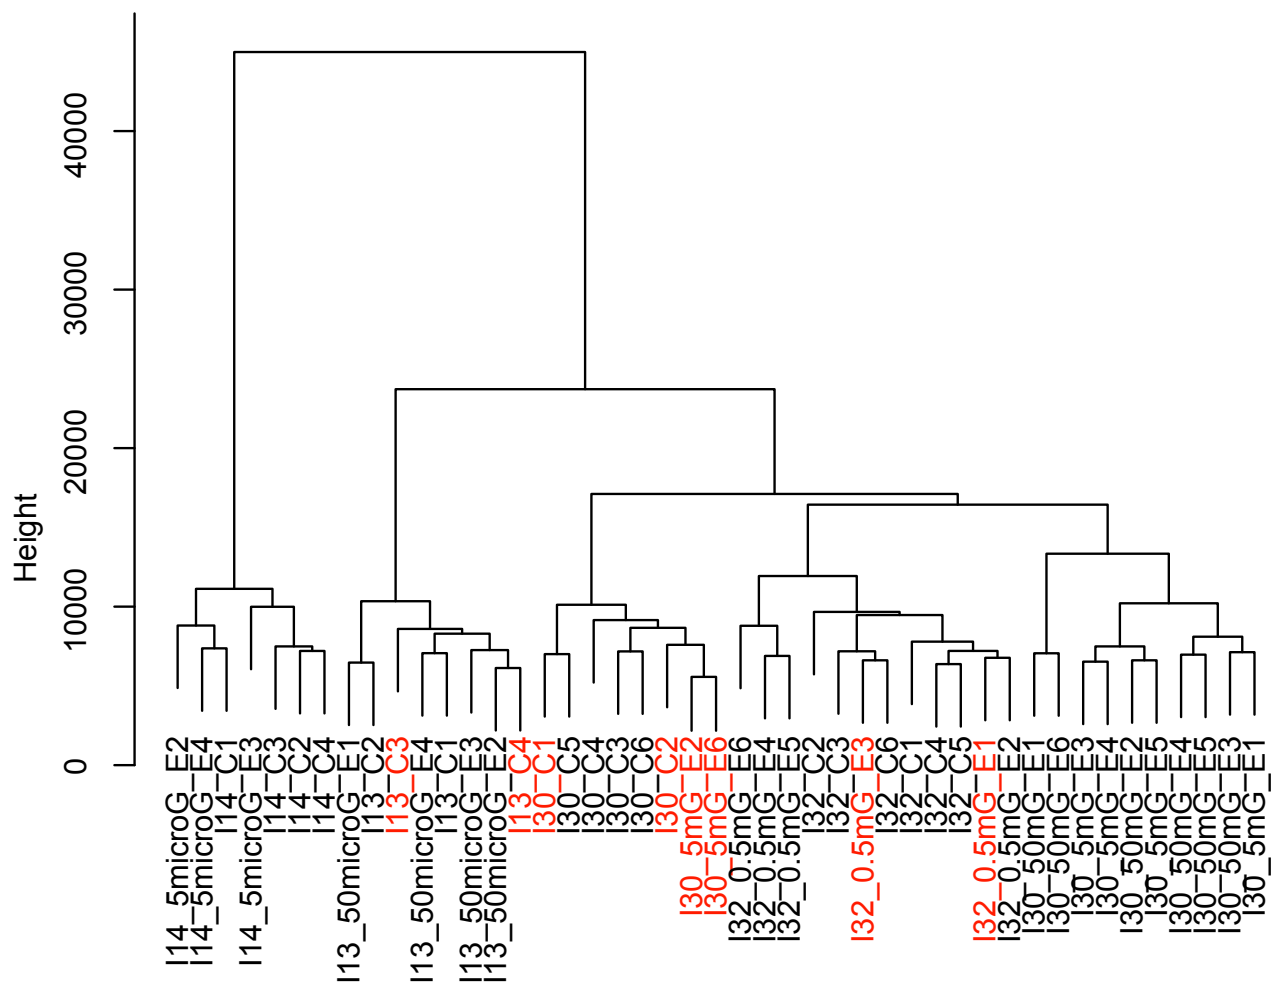**b**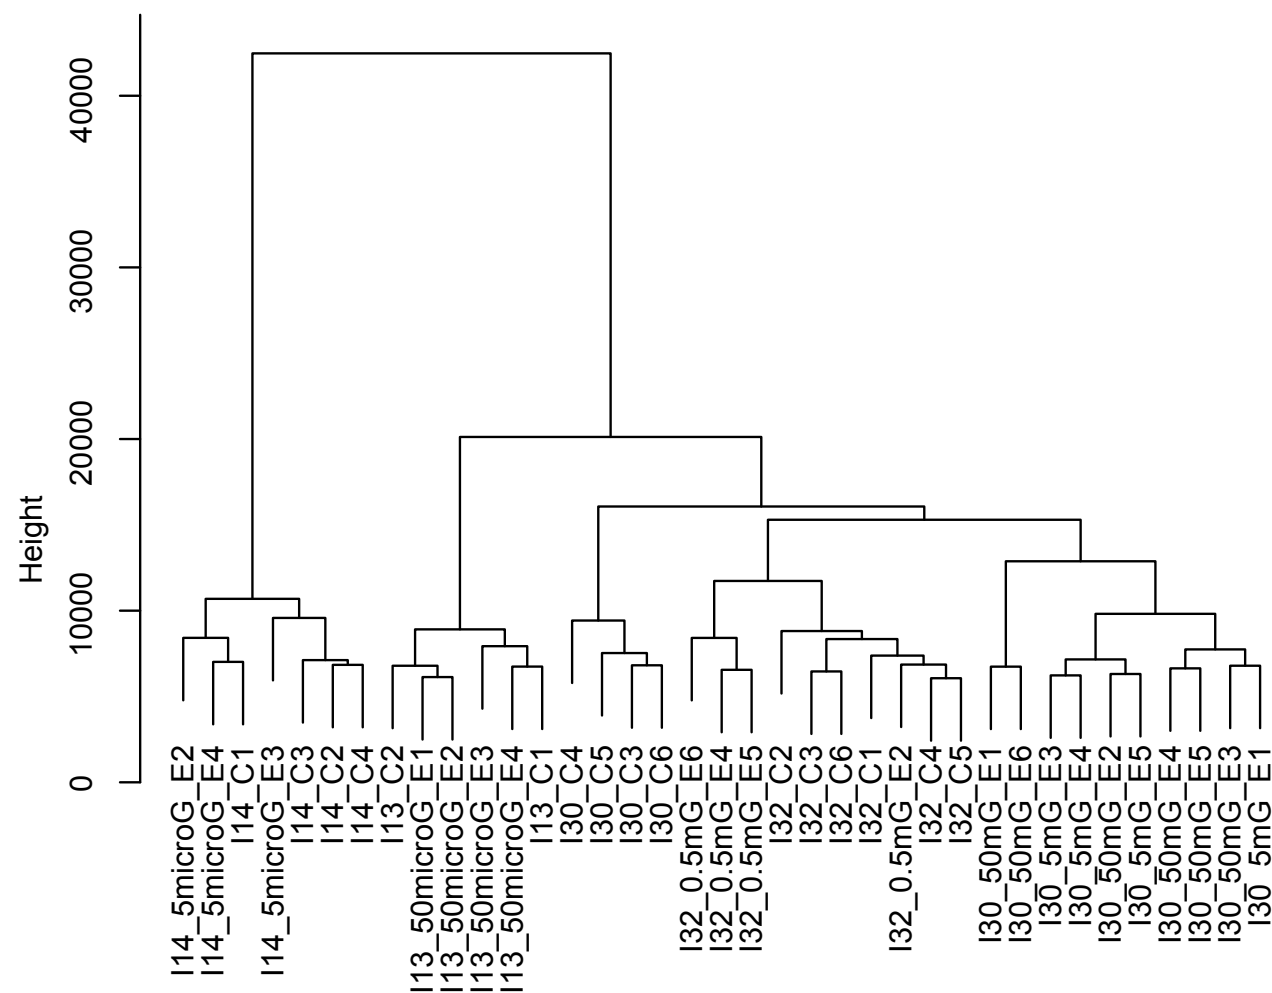

Supplementary Figure S1

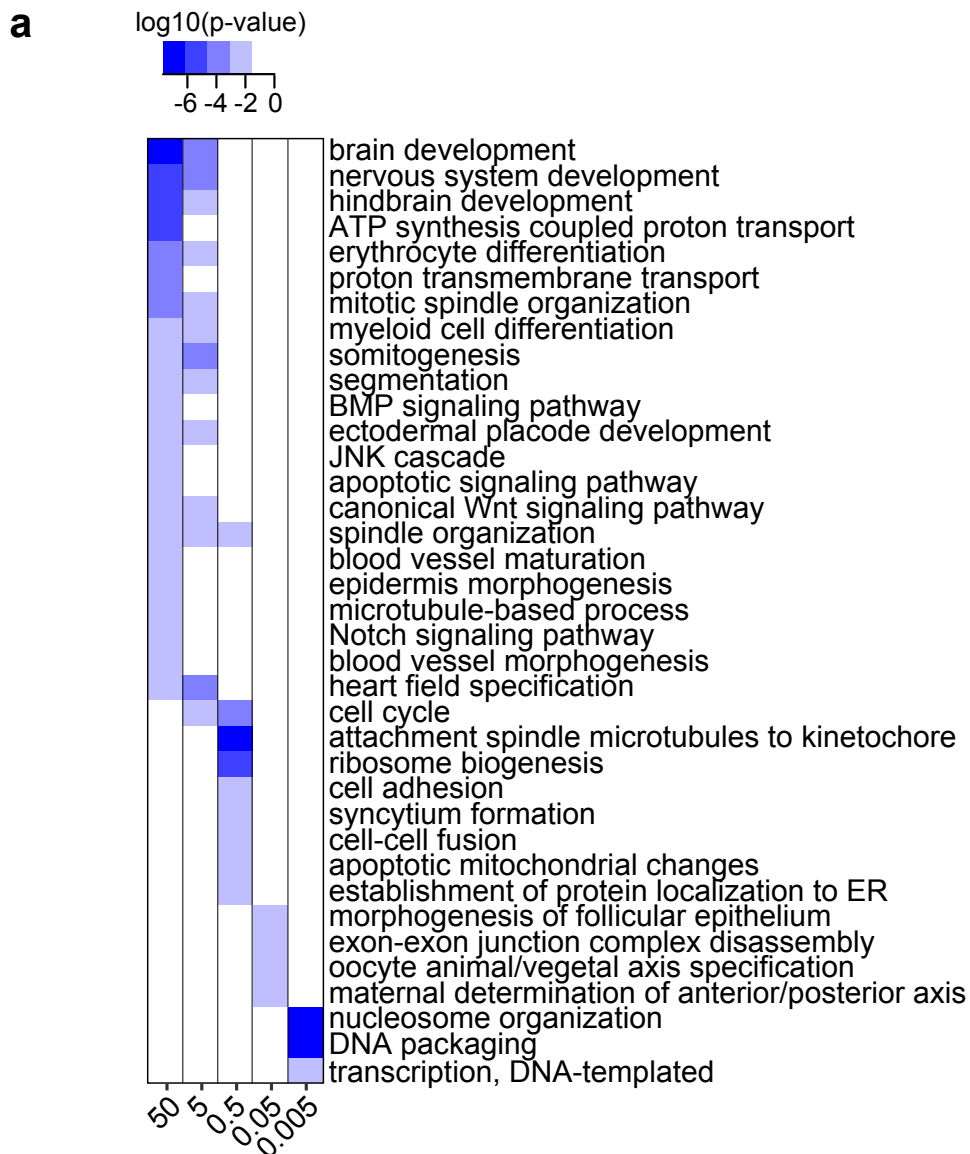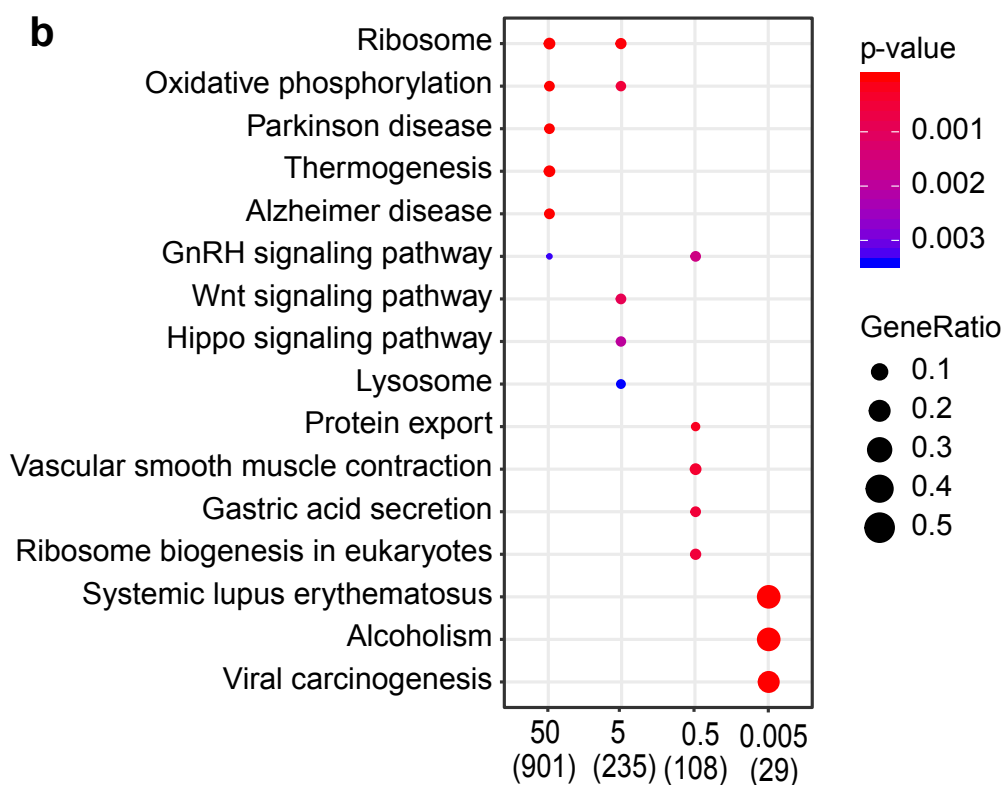

Supplementary Figure S2

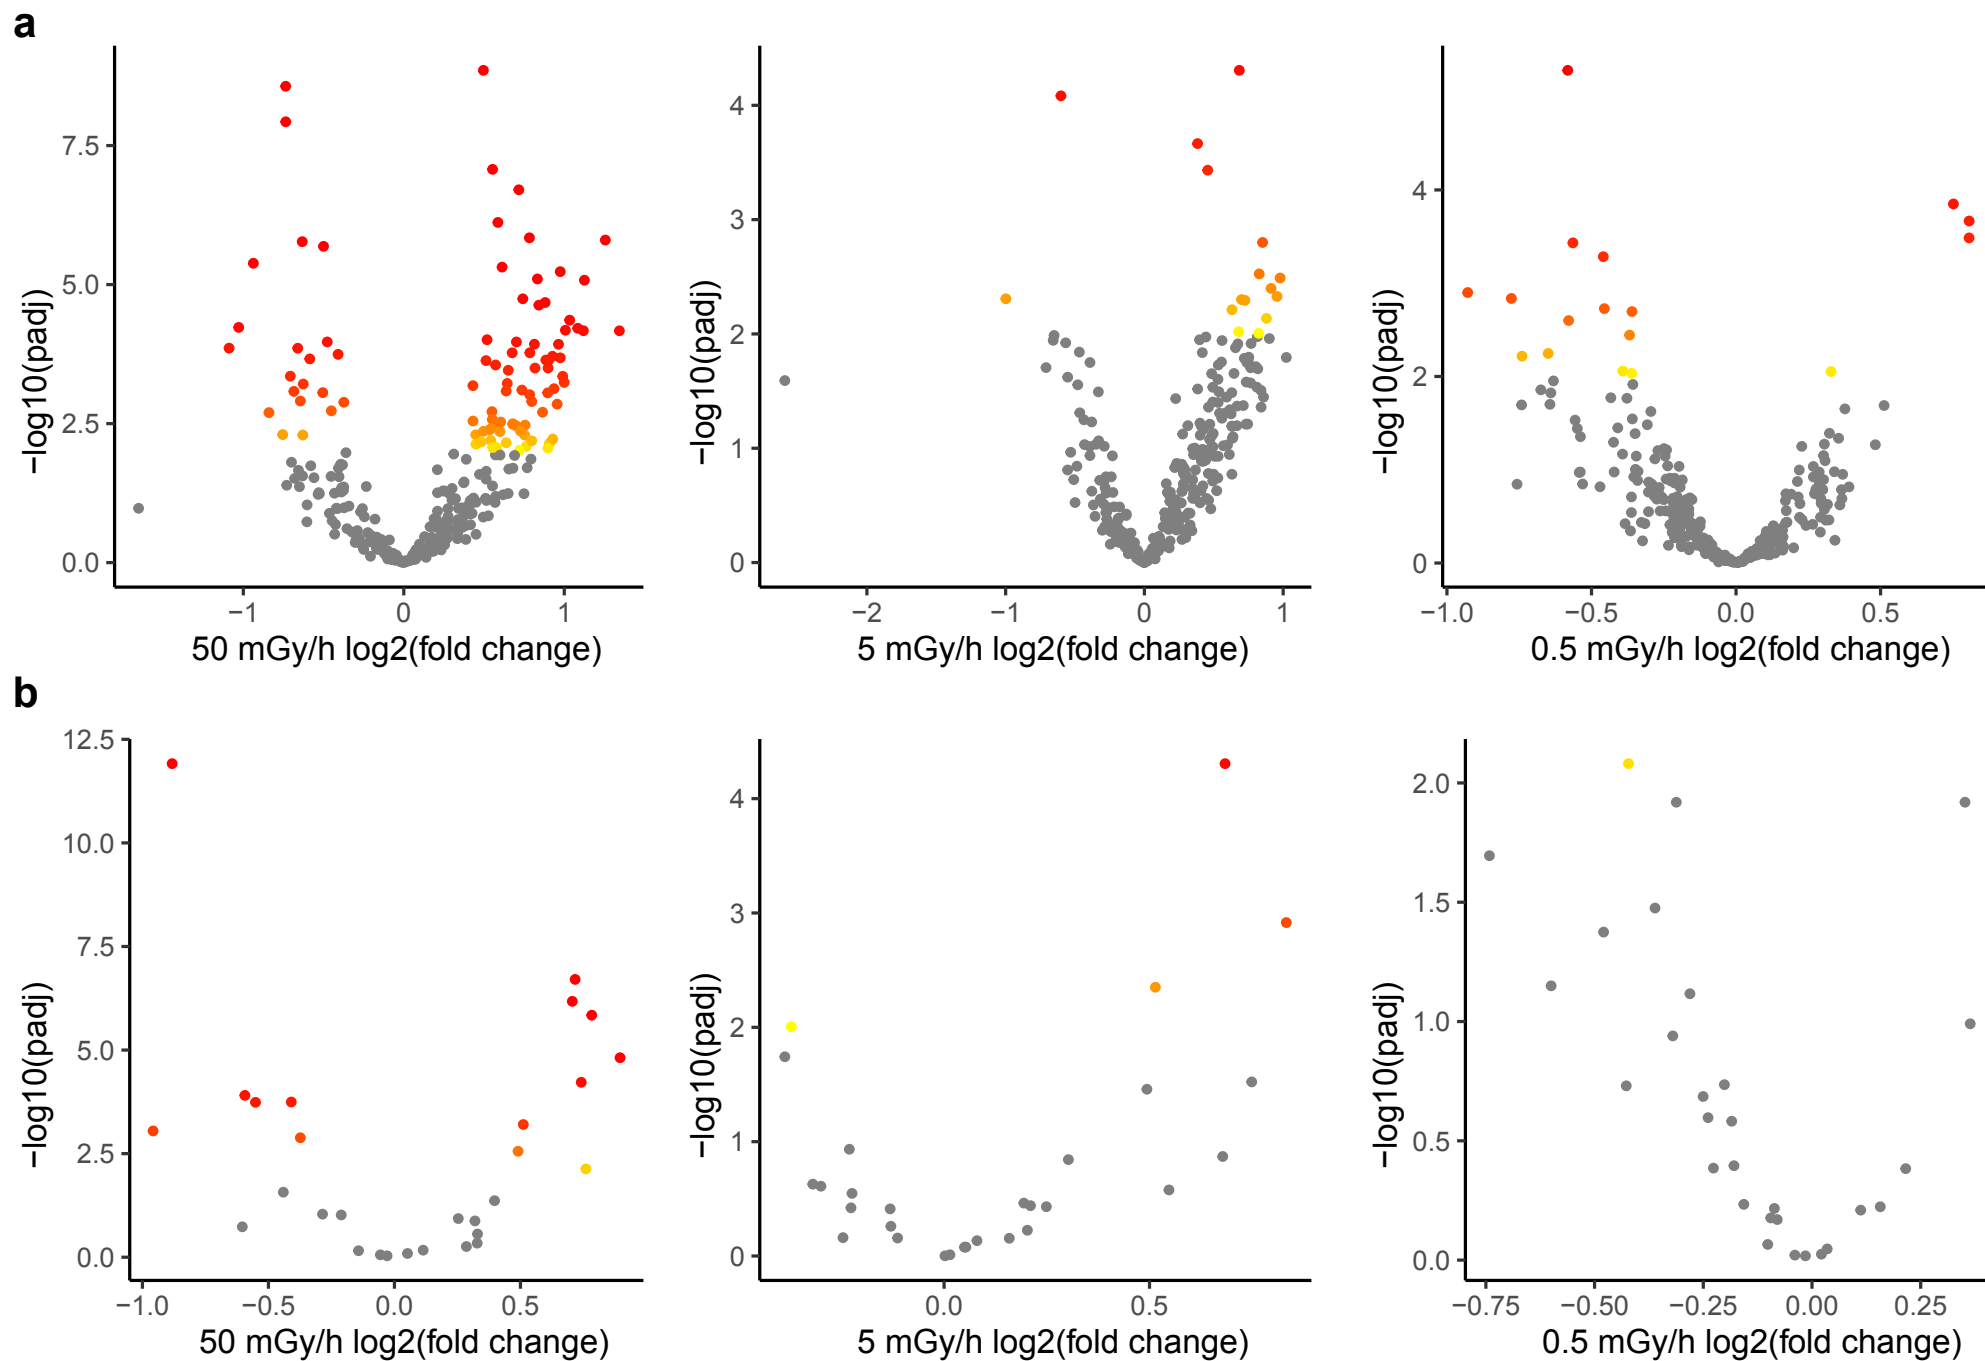

Supplementary Figure S3

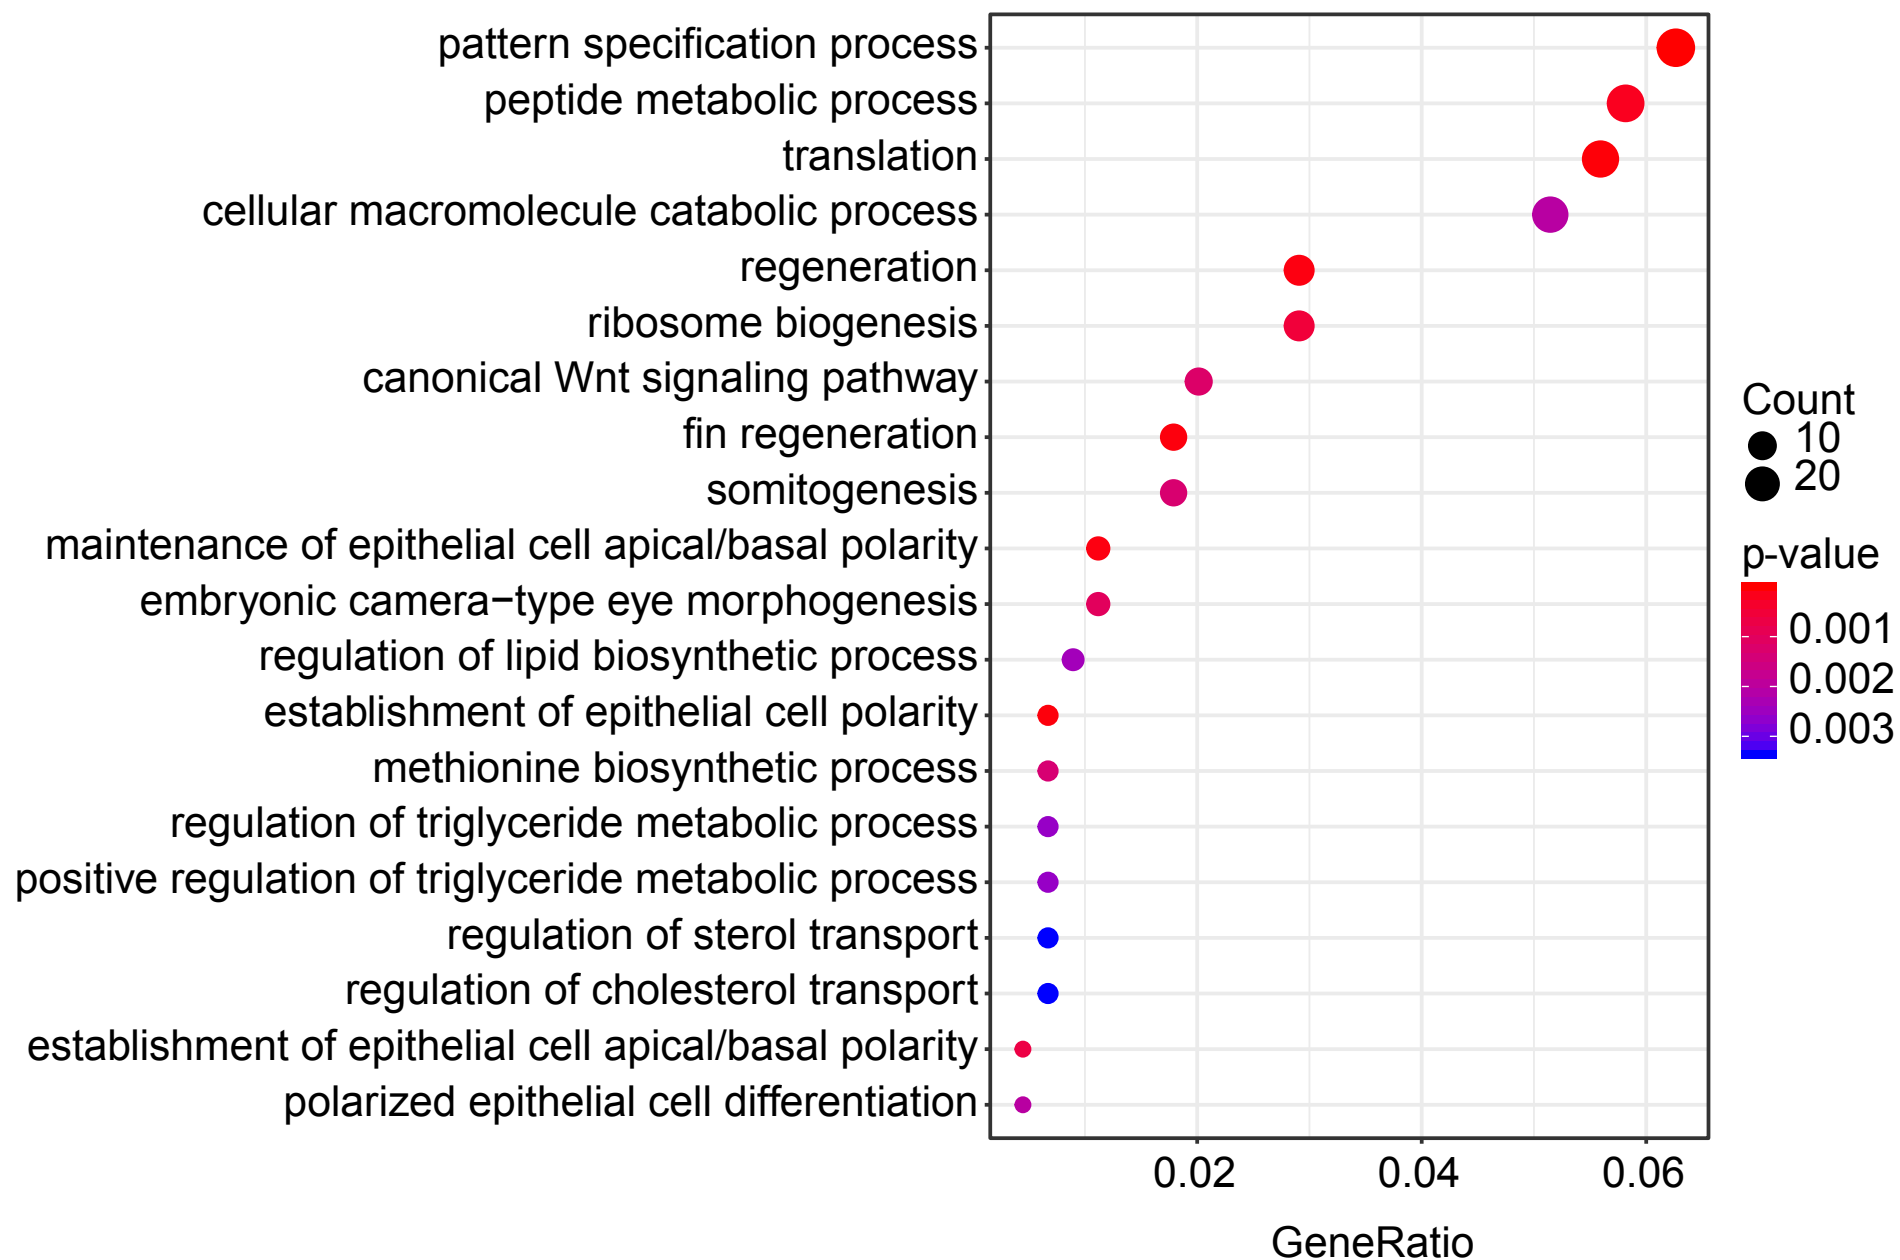

Supplementary Figure S4



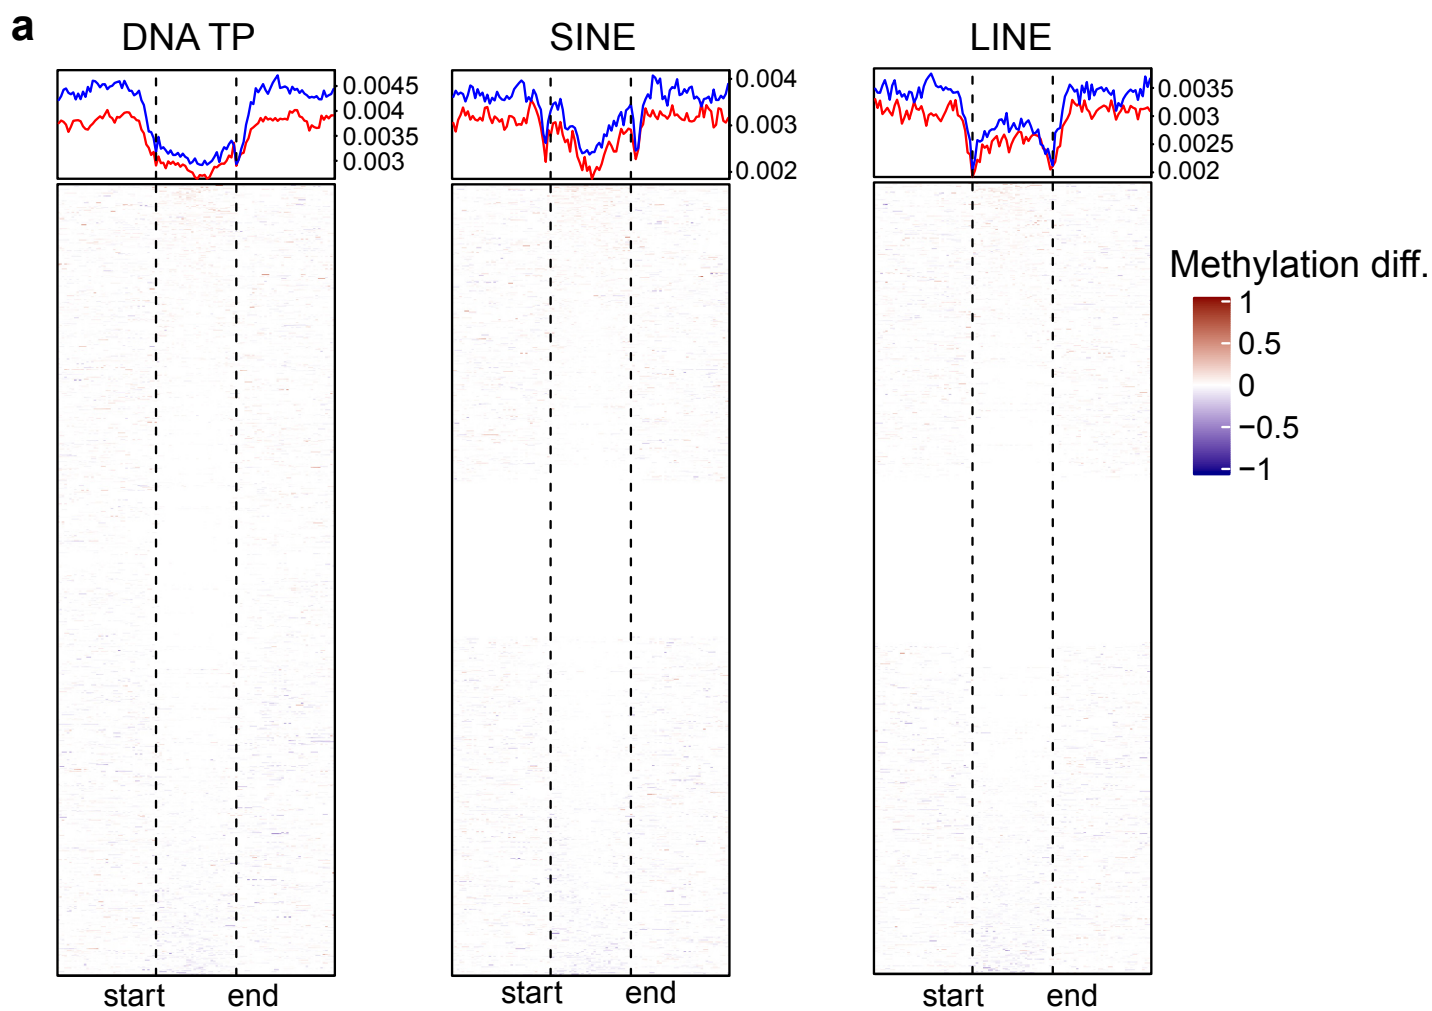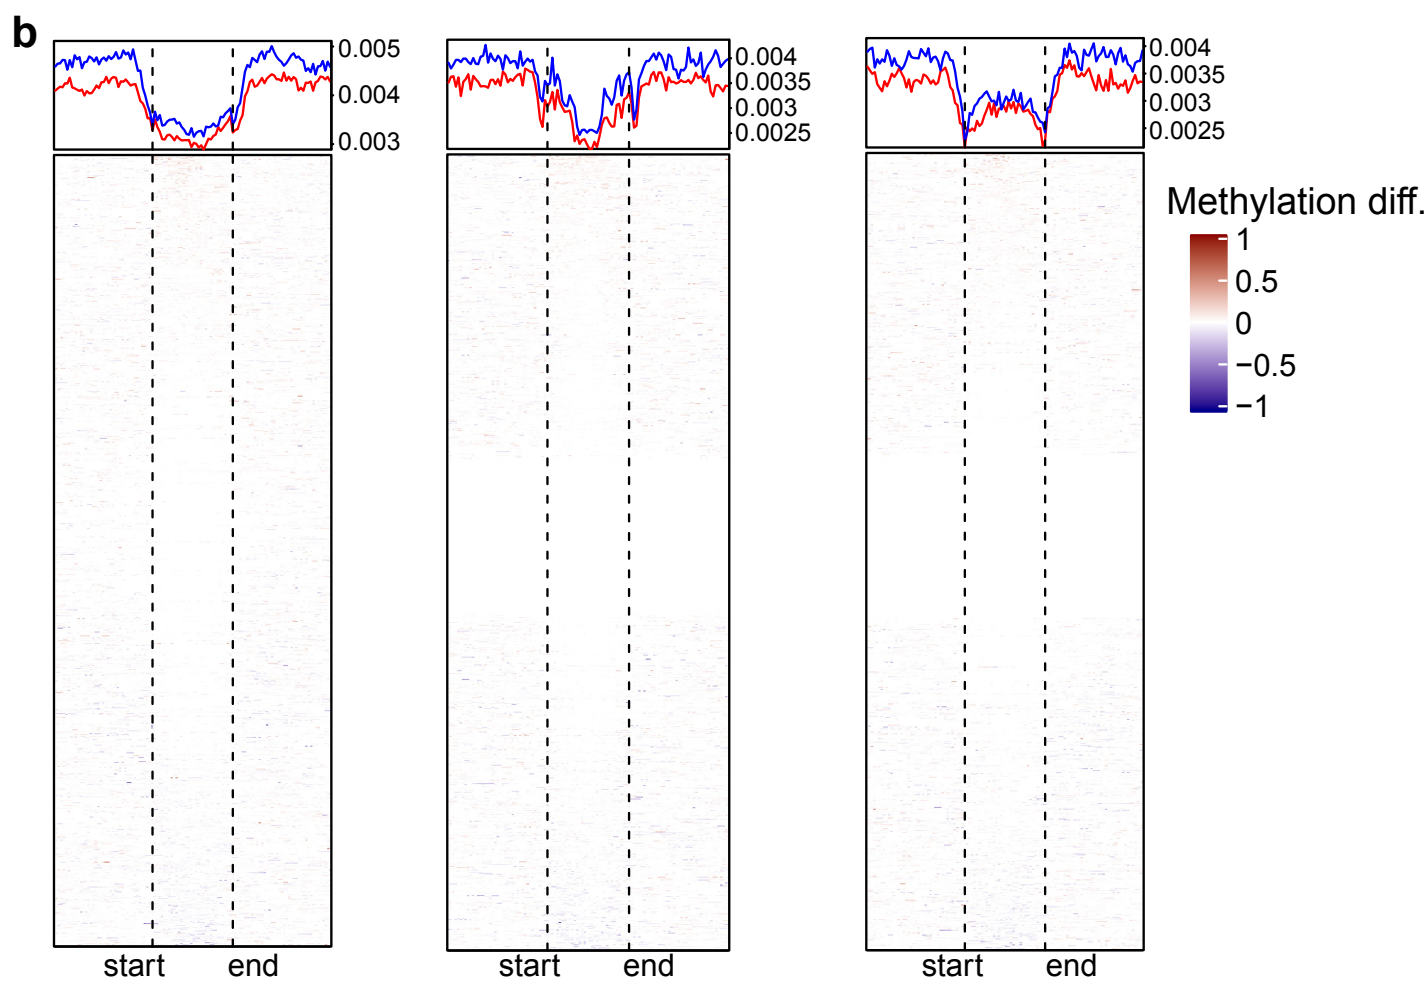

Supplementary Figure S6

**a**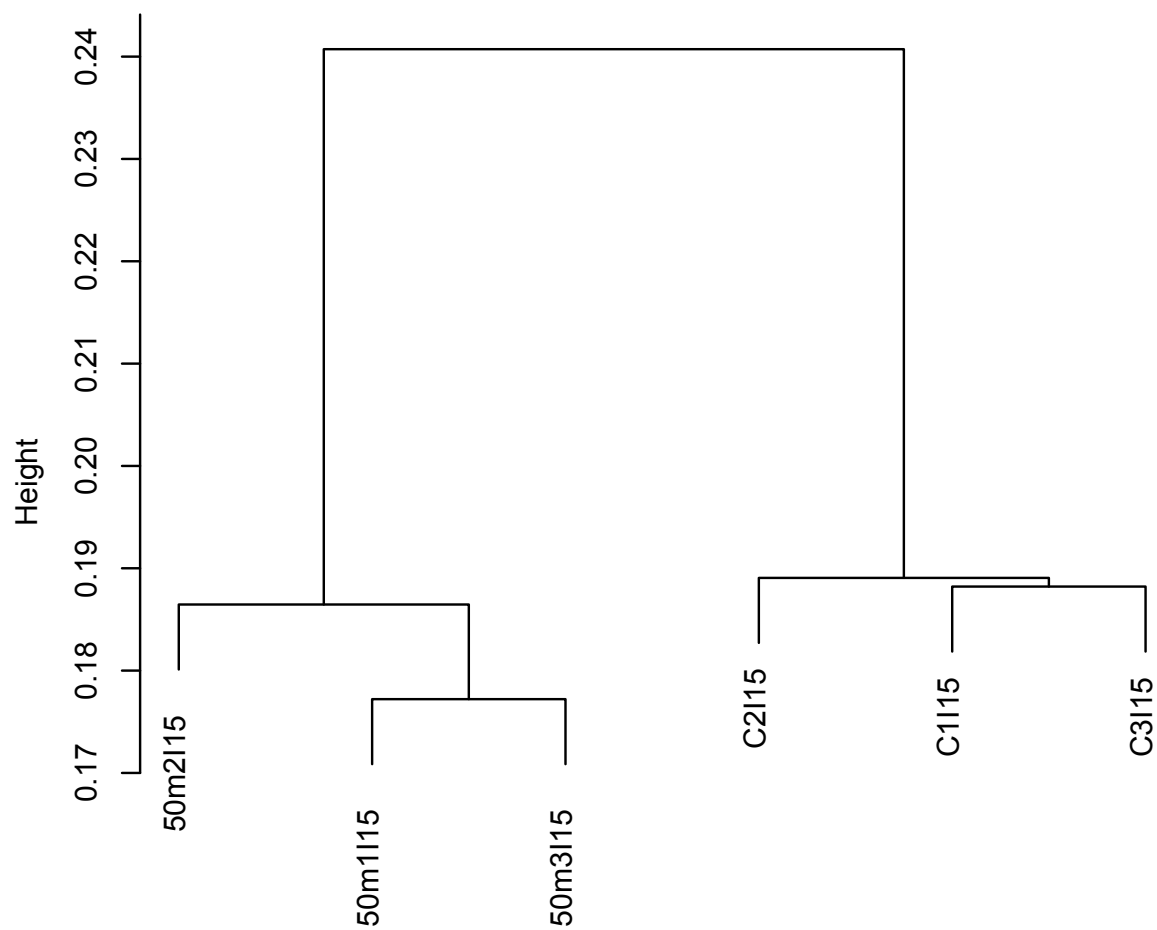**b**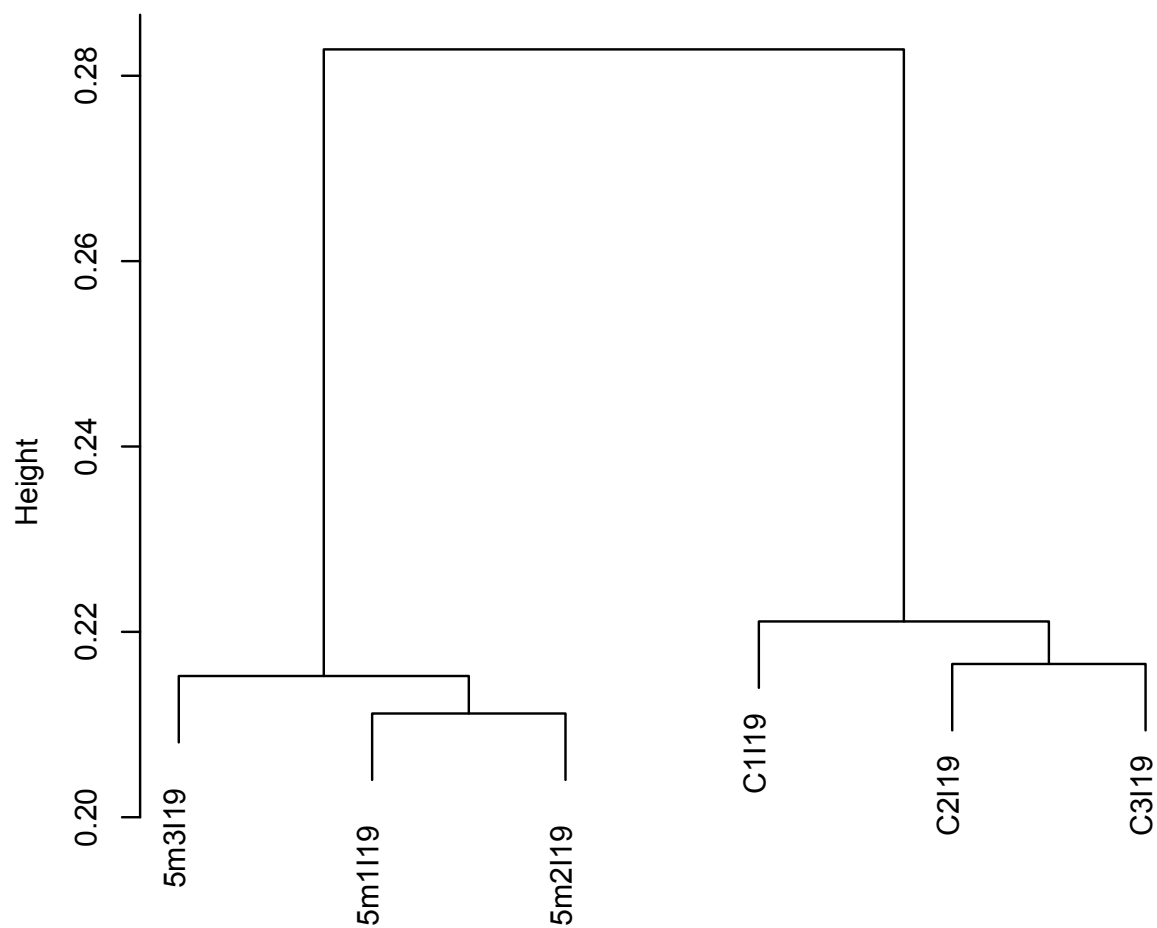

Supplementary Figure S7
